# Supplementary material for: Fast and scalable search of whole-slide images via self-supervised deep learning
Source: Springer Nature journal article supplement (doi:10.1038/s41551-022-00929-8), 2022-10-10
Supplement: MOESM1 [file 41551_2022_929_MOESM1_ESM.pdf]

---

**Supplementary information**

---

**Fast and scalable search of whole-slide  
images via self-supervised deep learning**

---

In the format provided by the  
authors and unedited

# Contents

| Supplementary Figures |                                                                  | Page |
|-----------------------|------------------------------------------------------------------|------|
| <b>Figure 1</b>       | Confusion matrices and hamming distance matrices in TCGA cohort. | 2    |
| <b>Figure 2</b>       | Confusion matrices and hamming distance matrices in BWH cohort.  | 3    |
| <b>Figure 3</b>       | The majority-5 accuracy on Kather100k dataset.                   | 4    |
| <b>Figure 4</b>       | VQ-VAE model architecture                                        | 4    |
| <b>Figure 5</b>       | Example of encoding a whole slide image                          | 5    |
| <b>Figure 6</b>       | Results for interpretation study                                 | 5    |
| <b>Figure 7</b>       | Results for cross independent cohort retrieval                   | 6    |

| Supplementary Tables |                                                                          | Page |
|----------------------|--------------------------------------------------------------------------|------|
| <b>Table 1</b>       | Numerical results of SISH and Yottixel on TCGA                           | 7    |
| <b>Table 2</b>       | Numerical results of SISH and Yottixel on BWH cohort                     | 7    |
| <b>Table 3</b>       | Numerical results of SISH and Yottixel on rare type cancers              | 9    |
| <b>Table 4</b>       | Summary of public data                                                   | 10   |
| <b>Table 5</b>       | Summary of in-house BWH data                                             | 11   |
| <b>Table 6</b>       | 5-fold cross validation accuracy of CLAM for each disease on BWH urinary | 12   |
| <b>Table 7</b>       | Individual retrieval result on TCGA cohort.                              | 12   |
| <b>Table 8</b>       | Individual retrieval result on TCGA plus CPTAC cohort.                   | 12   |
| <b>Table 9</b>       | Individual retrieval result on BWH independent test cohort               | 12   |
| <b>Table 10</b>      | Individual retrieval results on rare diseases                            | 12   |
| <b>Table 11</b>      | Individual retrieval result on anatomic site retrieval on TCGA cohort    | 12   |
| <b>Table 12</b>      | Individual retrieval result on Kather100k                                | 12   |
| <b>Table 13</b>      | Individual retrieval result on BWH prostate                              | 13   |
| <b>Table 14</b>      | Individual retrieval result on WSSS4LUAD                                 | 13   |
| <b>Table 15</b>      | Individual retrieval result on Atlas                                     | 13   |
| <b>Table 16</b>      | Individual retrieval result on BCSS                                      | 13   |
| <b>Table 17</b>      | Summary of comparison with other methods                                 | 13   |
| <b>Table 18</b>      | Summary of symbols used in Methods                                       | 14   |
| <b>Table 19</b>      | Summary of public datasets and the access links                          | 15   |

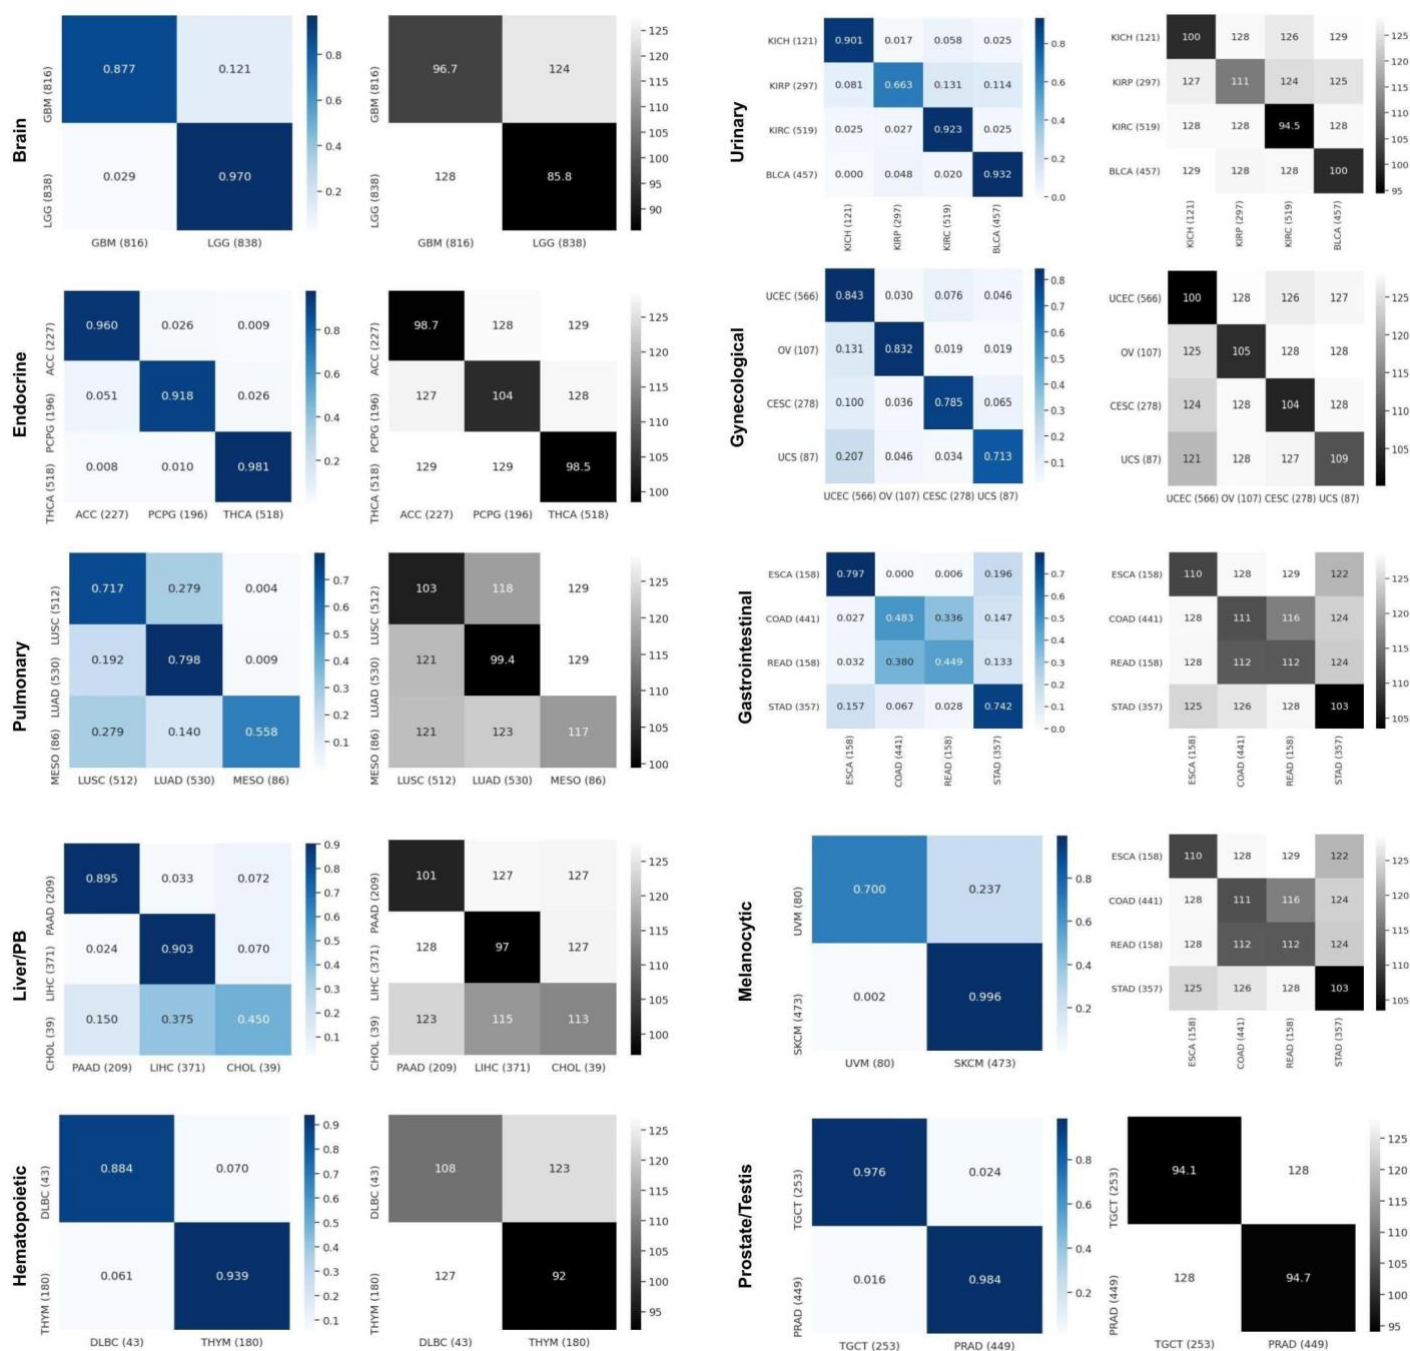

**Supplementary Figure 1. Confusion matrices and hamming distance matrices in TCGA cohort.** The confusion matrices and hamming distance matrices of SISH on TCGA cohort. A dark diagonal line, which suggested the majority results SISH retrieves match the queried diagnosis. The hamming distance matrices further explained the trends in the confusion matrices. The dark diagonal line shows the smallest hamming distance values in all sites, demonstrating that slides with different diagnosis are pushed far away in the hamming distance space. The x-axis and y-axis correspond to the model prediction and the ground truth respectively.

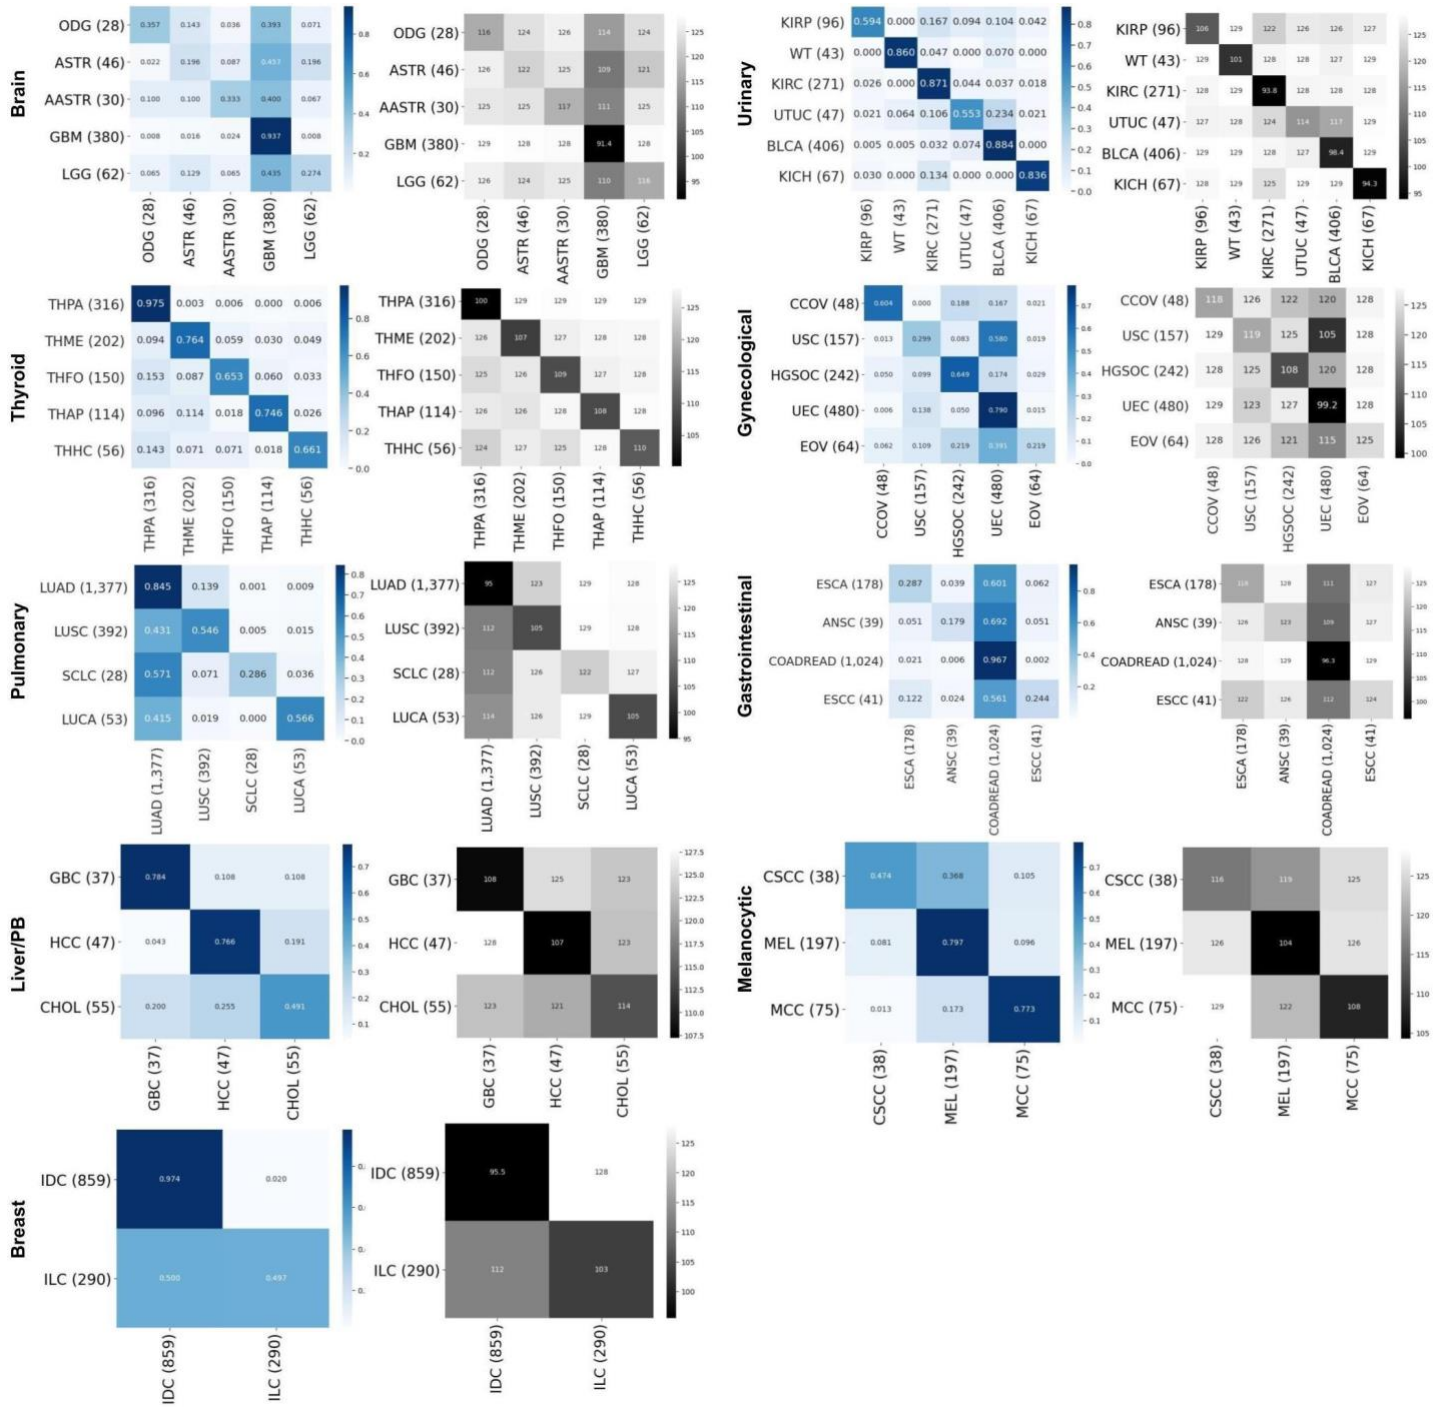

**Supplementary Figure 2. Confusion matrices and hamming distance matrices in BWH cohort.** The confusion matrices and hamming distance matrices of SISH on BWH cohort. A dark diagonal line, which suggested the majority results SISH retrieves match the queried diagnosis. The hamming distance matrices further explained the trends in the confusion matrices. The dark diagonal line shows the smallest hamming distance values in all sites, demonstrating that slides with different diagnosis are pushed far away in the hamming distance space. The x-axis and y-axis correspond to the model prediction and the ground truth respectively.

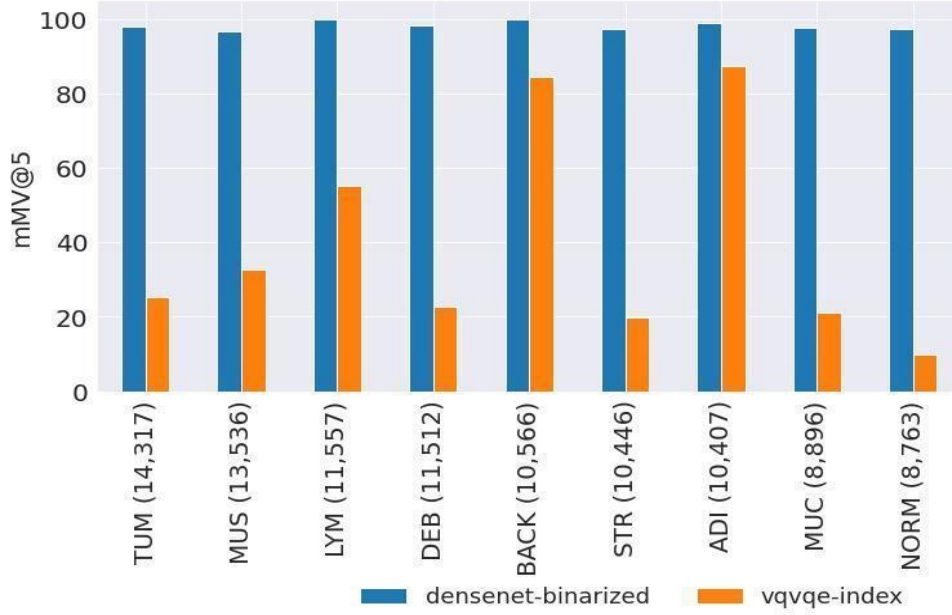

**Supplementary Figure 3. The majority-5 accuracy on Kather100k dataset.** The comparison of 5-nearest neighbor classification results by using VQ-VAE integer index and DenseNet feature. VQ-VAE integer index are generally worse, which means the pretrained on dataset does not lead to unfair comparison. To clarify, our method is a hierarchical search where the first level search relies on VQ-VAE index and the second level relies on Densenet feature. The benefit VQ-VAE index is in the first stage where it makes the number of neighbors needed to visit a constant. Detail results can be found in **Speed and Interpretability** section.

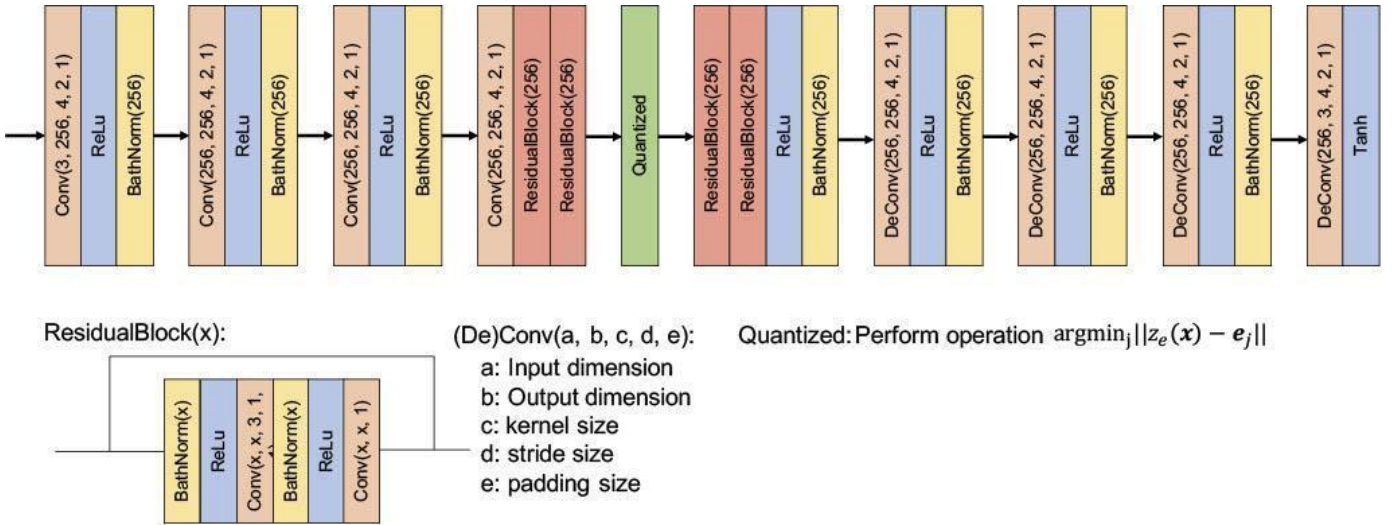

**Supplementary Figure 4. VQ-VAE model architecture.** The VQ-VAE architecture we used in our pipeline. The modules before the Quantized layer are encoder made up by a sequence of convolution, relu activation, batch normalization and residual module. After quantized layer is a decoder made up by a sequence of residual module, deconvolution, batch normalization and relu activation. We applied a tanh activation for the output layer



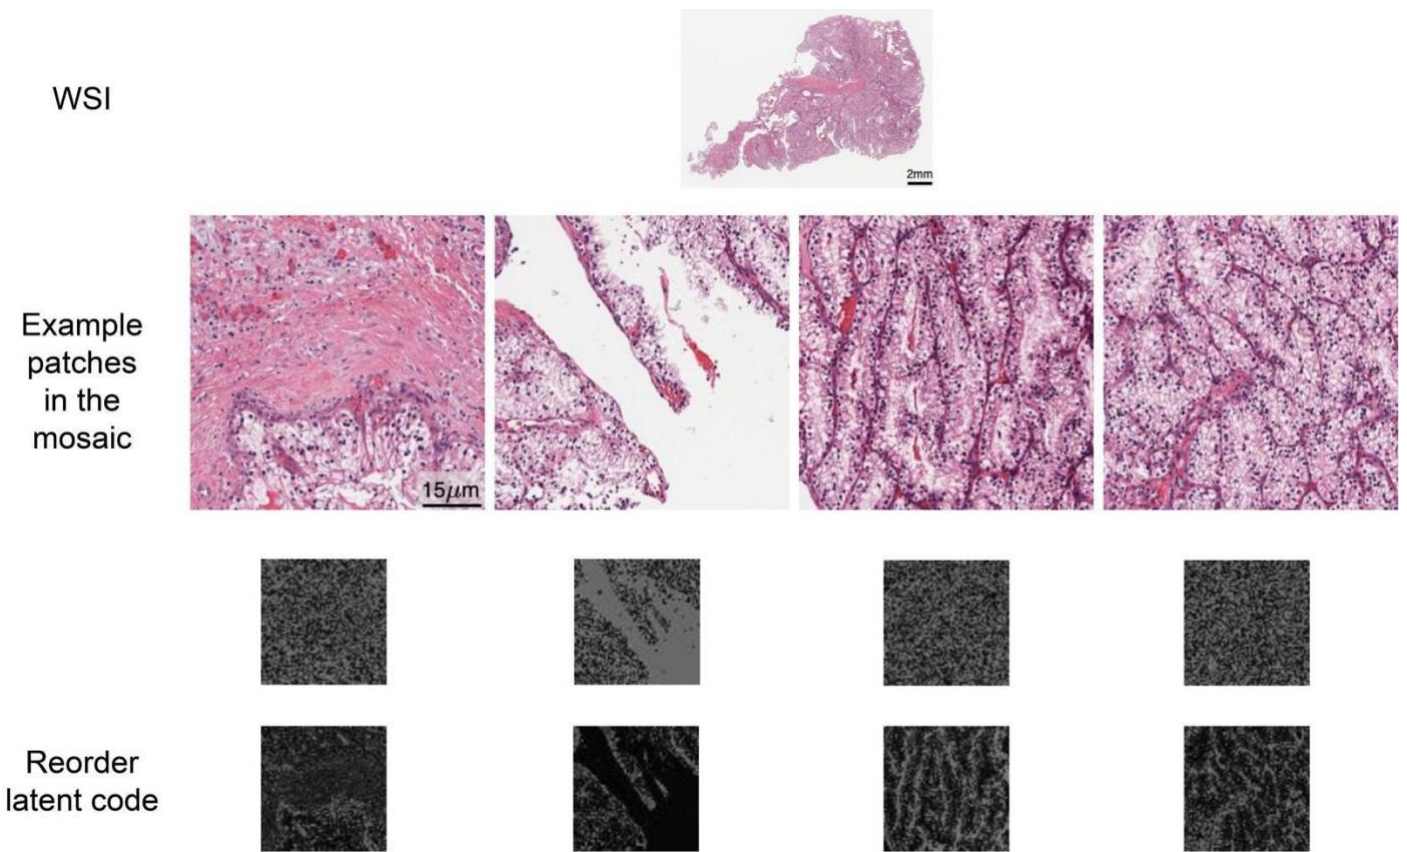

**Supplementary Figure 5. Example of encoding a whole slide image.** An example of how we convert a WSI to mosaics and reordered latent codes through mosaic generation, VQ-VAE encoding and reorder the latent code. Note that the reordered latent codes contain more semantic information in the original mosaics.

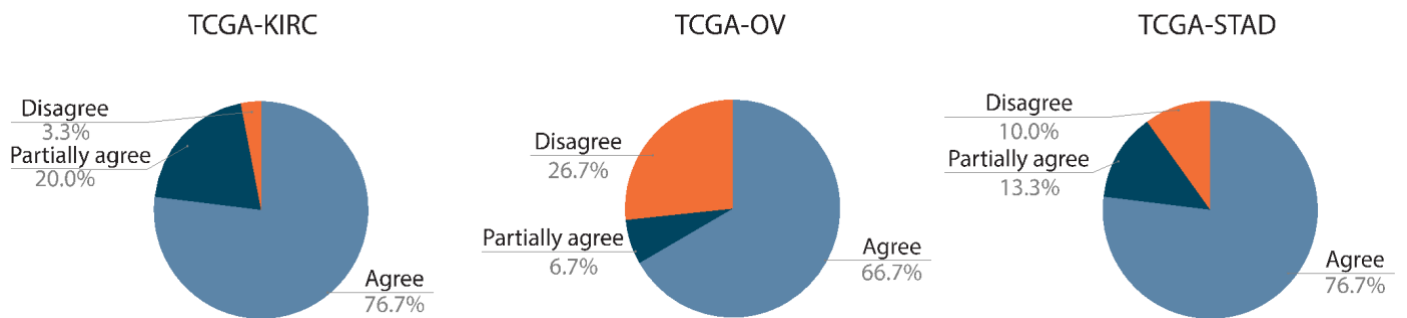

**Supplementary Figure 6. Results for interpretation study.** We studied kidney renal clear cell carcinoma (KIRC), Ovarian serous cystadenocarcinoma (OV) and Stomach adenocarcinoma (STAD) in TCGA cohort with 99.29%, 83.18% and 74.23% mMV@5 score, respectively. Each study contains 30 randomly selected queries and each query contain 1 to 5 ROIs. A pathologist rate `agree`, `partially agree`, and `disagree` based on whether the region contains tumor. The proportion of `agree` plus `partially agree` exceeds over 70% in all studies.

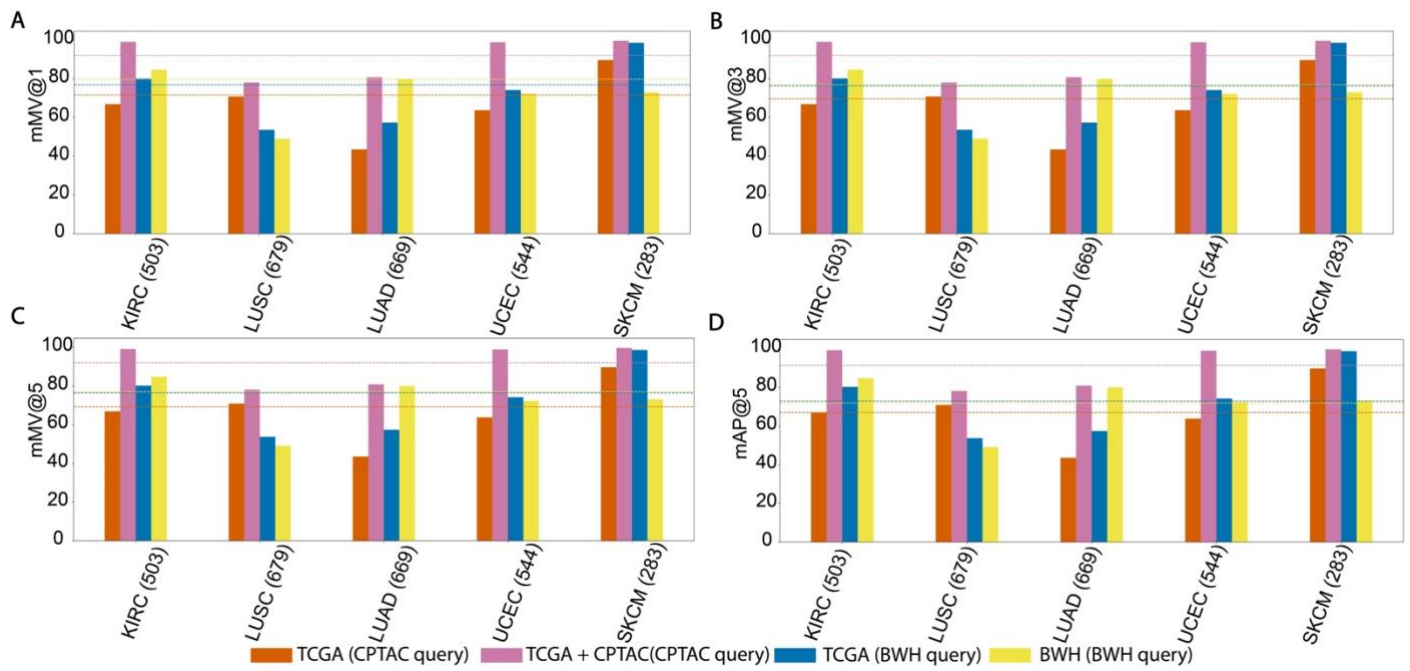

**Supplementary Figure 7. Results for cross independent cohort retrieval.** (A)-(D): The mMV@1,3,5, and mAP@5 results of cross independent cohort retrieval. The database was constructed on TCGA, TCGA + CPTAC, and BWH. The corresponding query slide is from CPTAC and BWH.

|                         | mMV@1        |          | mMV@3        |              | mMV@5        |              |
|-------------------------|--------------|----------|--------------|--------------|--------------|--------------|
|                         | SISH         | Yottixel | SISH         | Yottixel     | SISH         | Yottixel     |
| <b>Brain</b>            |              |          |              |              |              |              |
| LGG                     | <b>97.02</b> | 42.50    | <b>97.14</b> | 66.14        | <b>97.02</b> | 89.77        |
| GBM                     | <b>87.62</b> | 43.00    | <b>87.75</b> | 67.09        | 87.75        | <b>91.18</b> |
| <b>Endocrine</b>        |              |          |              |              |              |              |
| ACC                     | <b>95.59</b> | 42.5     | <b>96.04</b> | 68.165       | <b>96.04</b> | 93.83        |
| PCPG                    | <b>91.84</b> | 46.25    | <b>91.84</b> | 67.51        | <b>91.84</b> | 88.77        |
| THCA                    | <b>98.07</b> | 50.0     | <b>98.26</b> | 73.8         | <b>98.07</b> | 97.66        |
| <b>Liver</b>            |              |          |              |              |              |              |
| LIHC                    | <b>85.71</b> | 43.5     | <b>90.30</b> | 68.575       | 90.30        | <b>93.65</b> |
| PAAD                    | <b>85.17</b> | 42.5     | <b>88.04</b> | 66.77        | 89.47        | <b>91.04</b> |
| CHOL                    | <b>58.97</b> | 22.5     | <b>56.41</b> | 33.04        | <b>46.15</b> | 43.58        |
| <b>Gastrointestinal</b> |              |          |              |              |              |              |
| COAD                    | <b>40.82</b> | 32.50    | 45.58        | <b>54.32</b> | 48.30        | <b>76.14</b> |
| ESCA                    | <b>81.01</b> | 30.00    | <b>81.01</b> | 44.94        | <b>79.75</b> | 59.87        |
| READ                    | <b>51.90</b> | 5.00     | <b>46.84</b> | 7.60         | <b>44.94</b> | 10.19        |
| STAD                    | <b>72.55</b> | 33.50    | <b>73.11</b> | 54.31        | 74.23        | <b>75.12</b> |
| <b>Prostate</b>         |              |          |              |              |              |              |
| TGCT                    | <b>97.64</b> | 50.00    | <b>97.64</b> | 74.61        | 97.64        | <b>99.21</b> |
| PRAD                    | <b>98.44</b> | 50.00    | <b>98.44</b> | 74.22        | <b>98.44</b> | 98.43        |
| <b>Hematopoietic</b>    |              |          |              |              |              |              |
| DLBC                    | <b>90.70</b> | 30.00    | <b>88.37</b> | 44.07        | <b>88.37</b> | 58.13        |
| THYM                    | <b>93.89</b> | 50.00    | <b>94.44</b> | 74.44        | 93.89        | <b>98.87</b> |
| <b>Urinary</b>          |              |          |              |              |              |              |
| KIRP                    | <b>67.00</b> | 30.00    | <b>66.33</b> | 48.61        | 66.33        | <b>67.22</b> |
| KIRC                    | <b>91.52</b> | 45.00    | <b>92.10</b> | 68.33        | <b>92.29</b> | 91.66        |
| KICH                    | <b>90.08</b> | 35.00    | <b>90.08</b> | 55.46        | <b>90.10</b> | 75.92        |
| BLCA                    | <b>91.90</b> | 46.00    | <b>92.78</b> | 70.91        | 93.22        | <b>95.81</b> |
| <b>Melanocyte</b>       |              |          |              |              |              |              |
| UVM                     | <b>77.50</b> | 42.50    | <b>72.50</b> | 63.13        | 70.00        | <b>83.75</b> |
| SKCM                    | <b>99.58</b> | 50.00    | <b>99.58</b> | 74.79        | <b>99.58</b> | 99.57        |
| <b>Pulmonary</b>        |              |          |              |              |              |              |
| LUSC                    | <b>71.68</b> | 40.00    | <b>71.48</b> | 60.85        | 71.68        | <b>81.70</b> |
| LUAD                    | <b>80.38</b> | 32.50    | <b>79.81</b> | 51.73        | <b>79.81</b> | 70.96        |
| MESO                    | <b>66.28</b> | 5.00     | <b>62.79</b> | 6.57         | <b>55.81</b> | 8.13         |
| <b>Gynecology</b>       |              |          |              |              |              |              |
| OV                      | <b>85.05</b> | 32.50    | <b>84.11</b> | 49.74        | <b>83.18</b> | 66.98        |
| UCS                     | <b>74.71</b> | 20.00    | <b>72.41</b> | 31.11        | <b>71.26</b> | 42.22        |
| CESC                    | <b>82.01</b> | 30.00    | <b>80.58</b> | 46.23        | <b>78.78</b> | 62.45        |
| UCEC                    | <b>82.33</b> | 45.00    | <b>82.86</b> | 68.61        | 84.28        | <b>92.22</b> |
| <b>Average</b>          | <b>82.31</b> | 36.80    | <b>82.02</b> | 56.40        | <b>81.33</b> | 76.00        |

**Supplementary Table 1. Numerical results of SISH and Yottixel on TCGA.** mMV@1,3,5 scores for each subtype on TCGA. The numeric results of Yottixel were estimated from the figure in the original paper.



|                  | Subtype   | mMV@1        |              | mMV@3        |              | mMV@5        |              | mAP@5        |              |
|------------------|-----------|--------------|--------------|--------------|--------------|--------------|--------------|--------------|--------------|
|                  |           | SISH         | Yottixel     | SISH         | Yottixel     | SISH         | Yottixel     | SISH         | Yottixel     |
| Brain            | GBM       | 87.11        | <b>91.84</b> | 90.26        | <b>96.32</b> | 93.68        | <b>97.63</b> | <b>88.98</b> | 88.22        |
|                  | LGG, NOS  | <b>45.16</b> | 40.32        | 32.26        | <b>37.10</b> | 27.42        | <b>33.87</b> | <b>21.85</b> | 20.49        |
|                  | ASTR      | <b>23.91</b> | 17.39        | 15.21        | <b>17.39</b> | <b>19.56</b> | 13.04        | <b>10.97</b> | 8.90         |
|                  | AASTR     | <b>50.00</b> | 33.33        | <b>33.33</b> | 30.00        | <b>33.33</b> | 20.00        | <b>23.99</b> | 14.42        |
|                  | ODG       | <b>53.57</b> | 32.14        | <b>46.43</b> | 35.71        | <b>35.71</b> | 25.00        | <b>26.19</b> | 17.76        |
| Thyroid          | THPA      | <b>96.20</b> | 86.08        | <b>96.84</b> | 95.25        | 97.47        | <b>98.73</b> | <b>95.36</b> | 79.73        |
|                  | THAP      | <b>77.19</b> | 71.93        | <b>76.32</b> | 69.30        | <b>74.56</b> | 65.79        | <b>69.61</b> | 53.68        |
|                  | THFO      | 68.00        | <b>72.00</b> | <b>65.33</b> | 64.67        | <b>65.33</b> | 64.67        | <b>59.26</b> | 49.61        |
|                  | THME      | 77.72        | <b>80.69</b> | 77.23        | <b>82.67</b> | 76.73        | <b>83.66</b> | <b>74.48</b> | 72.51        |
|                  | THHC      | <b>71.43</b> | 64.29        | <b>69.64</b> | 62.50        | <b>66.07</b> | 51.79        | <b>50.78</b> | 38.53        |
| Gastrointestinal | COAD READ | 92.09        | <b>92.97</b> | 95.41        | <b>96.78</b> | 96.68        | <b>98.14</b> | <b>92.85</b> | 89.86        |
|                  | ESCA      | 42.13        | <b>47.19</b> | 35.39        | <b>41.01</b> | 28.65        | <b>44.38</b> | 24.91        | <b>30.20</b> |
|                  | ESCC      | <b>26.83</b> | 14.63        | <b>21.95</b> | 14.63        | <b>24.39</b> | 7.32         | <b>12.38</b> | 6.81         |
|                  | ANSC      | <b>38.46</b> | 33.33        | 17.95        | <b>30.77</b> | 17.95        | <b>25.64</b> | <b>15.16</b> | 13.26        |
| Gynecological    | UEC       | 73.54        | <b>80.83</b> | 77.29        | <b>86.88</b> | 78.96        | <b>89.58</b> | <b>72.26</b> | 68.99        |
|                  | HGSOC     | <b>60.33</b> | 52.07        | <b>62.81</b> | 53.72        | <b>64.88</b> | 57.02        | <b>50.24</b> | 34.77        |
|                  | USC       | <b>42.04</b> | 31.21        | <b>39.49</b> | 26.11        | <b>29.94</b> | 24.84        | <b>24.27</b> | 18.55        |
|                  | EOV       | <b>35.94</b> | 20.31        | <b>28.15</b> | 14.06        | <b>21.88</b> | 18.75        | <b>15.93</b> | 11.93        |
|                  | CCOV      | <b>64.58</b> | 35.42        | <b>62.50</b> | 37.50        | <b>60.42</b> | 29.17        | <b>37.62</b> | 16.89        |
| Liver biliary    | HCC       | <b>74.47</b> | <b>74.47</b> | 76.60        | <b>78.72</b> | 76.60        | <b>82.98</b> | <b>67.50</b> | 52.61        |
|                  | GBC       | <b>72.97</b> | 56.76        | <b>72.97</b> | 62.16        | <b>78.38</b> | 62.16        | <b>64.24</b> | 49.05        |
|                  | CHOL      | 49.09        | <b>69.09</b> | 49.09        | <b>74.54</b> | 49.09        | <b>69.09</b> | 46.09        | <b>46.19</b> |
| Cutaneous        | MEL       | 74.11        | <b>76.65</b> | 79.19        | <b>84.77</b> | 79.70        | <b>88.83</b> | <b>73.00</b> | 66.80        |
|                  | MCC       | <b>82.67</b> | 69.33        | <b>80.00</b> | 66.67        | <b>77.33</b> | 61.33        | <b>72.90</b> | 52.89        |
|                  | CSCC      | <b>63.16</b> | 34.21        | <b>50.00</b> | 28.95        | <b>47.37</b> | 28.95        | <b>42.18</b> | 21.45        |
| Pulmonary        | LUAD      | 79.74        | <b>84.97</b> | 83.44        | <b>92.30</b> | 84.46        | <b>94.19</b> | <b>79.90</b> | 77.25        |
|                  | LUSC      | <b>59.95</b> | 49.49        | <b>57.65</b> | 44.39        | <b>54.59</b> | 44.64        | <b>49.05</b> | 35.87        |
|                  | LUCA      | <b>73.58</b> | 20.75        | <b>60.38</b> | 13.21        | <b>56.60</b> | 9.43         | <b>45.51</b> | 8.31         |
|                  | SCLC      | <b>42.86</b> | 17.86        | <b>35.71</b> | 17.86        | <b>28.57</b> | 10.71        | <b>23.79</b> | 12.57        |
| Urinary          | BLCA      | 86.45        | <b>91.38</b> | 87.68        | <b>92.12</b> | 88.42        | <b>94.58</b> | <b>86.81</b> | 86.67        |
|                  | KIRC      | 85.61        | <b>89.30</b> | 86.72        | <b>92.62</b> | 87.08        | <b>95.57</b> | <b>84.69</b> | 80.72        |
|                  | KICH      | <b>85.07</b> | 70.15        | <b>86.57</b> | 64.18        | <b>83.58</b> | 64.18        | <b>81.56</b> | 57.22        |
|                  | KIRP      | <b>61.46</b> | 58.33        | <b>60.42</b> | 54.17        | <b>59.38</b> | 50.00        | <b>51.89</b> | 39.99        |
|                  | WT        | <b>88.37</b> | 76.74        | <b>88.37</b> | 72.09        | <b>86.05</b> | 76.74        | <b>82.22</b> | 67.36        |
|                  | UTUC      | <b>63.83</b> | 42.55        | <b>55.32</b> | 25.53        | <b>55.32</b> | 27.66        | <b>32.55</b> | 17.97        |
| Breast           | IDC       | <b>97.56</b> | 93.36        | 97.44        | <b>98.25</b> | 97.44        | <b>99.19</b> | <b>97.30</b> | 88.17        |
|                  | ILC       | 50.34        | <b>53.10</b> | <b>50.69</b> | 50.00        | <b>49.66</b> | 46.90        | 48.56        | <b>49.30</b> |
| Average          |           | <b>65.34</b> | 57.47        | <b>62.22</b> | 56.89        | <b>60.90</b> | 55.57        | <b>53.97</b> | 44.47        |

**Supplementary Table 2. Numerical results of SISH and Yottixel on BWH cohort.** SISH achieved 5-8% higher mMV@k (k=1,3,5) than Yottixel and outperformed 33 out of 37 subtypes on mAP@5.

|                  | Subtype | mMV@1        |              | mMV@3        |              | mMV@5        |              | mAP@5        |             |
|------------------|---------|--------------|--------------|--------------|--------------|--------------|--------------|--------------|-------------|
|                  |         | SISH         | Yottixel     | SISH         | Yottixel     | SISH         | Yottixel     | SISH         | Yottixel    |
| Brain            | ASTR    | <b>34.78</b> | 26.09        | <b>36.96</b> | 26.09        | 32.61        | <b>36.96</b> | <b>24.55</b> | 19.92       |
|                  | AASTR   | 43.33        | <b>53.33</b> | <b>43.33</b> | <b>43.33</b> | <b>40.00</b> | <b>40.00</b> | <b>29.31</b> | 21.96       |
|                  | ODG     | 46.43        | <b>60.71</b> | 39.29        | <b>53.57</b> | <b>42.86</b> | <b>42.86</b> | <b>27.33</b> | 26.26       |
|                  | PAST    | <b>65.00</b> | 45.00        | <b>55.00</b> | 40.00        | <b>55.00</b> | 45.00        | <b>38.68</b> | 27.48       |
|                  | AODG    | 14.29        | <b>21.43</b> | <b>14.29</b> | <b>14.29</b> | <b>7.14</b>  | <b>7.14</b>  | 6.57         | <b>9.74</b> |
| Thyroid          | THAP    | <b>80.70</b> | 76.32        | <b>78.95</b> | 72.81        | <b>77.19</b> | 71.93        | <b>73.98</b> | 57.46       |
|                  | THFO    | <b>76.67</b> | 74.67        | <b>74.00</b> | 69.33        | <b>72.67</b> | 70.66        | <b>68.09</b> | 53.09       |
|                  | THME    | 78.22        | <b>83.66</b> | 78.71        | <b>87.62</b> | 80.20        | <b>89.11</b> | <b>77.59</b> | 75.33       |
|                  | THHC    | <b>82.14</b> | 69.64        | <b>80.36</b> | 66.07        | <b>75.00</b> | 55.36        | <b>59.30</b> | 41.20       |
| Gastrointestinal | ESCC    | <b>58.54</b> | <b>58.54</b> | 58.54        | <b>70.73</b> | 53.66        | <b>65.85</b> | <b>52.54</b> | 45.87       |
|                  | ANSC    | <b>64.10</b> | 61.54        | 64.10        | <b>66.67</b> | 66.67        | <b>71.79</b> | <b>63.53</b> | 51.48       |
| Gynecological    | USC     | <b>92.99</b> | 91.08        | 94.27        | <b>96.18</b> | 93.63        | <b>98.09</b> | <b>93.04</b> | 84.83       |
|                  | EOV     | <b>46.88</b> | <b>46.88</b> | 45.31        | <b>53.13</b> | 43.75        | <b>50.00</b> | <b>38.79</b> | 35.47       |
|                  | CCOV    | <b>62.50</b> | 47.92        | <b>60.42</b> | 47.92        | <b>58.33</b> | 50.00        | <b>54.85</b> | 32.21       |
| Liver biliary    | PAAD    | 91.87        | <b>92.82</b> | <b>94.74</b> | <b>94.74</b> | 94.26        | <b>95.69</b> | <b>91.41</b> | 81.77       |
|                  | CHOL    | 70.21        | <b>71.28</b> | 69.15        | <b>71.28</b> | 69.15        | <b>74.47</b> | <b>63.12</b> | 57.52       |
|                  | PANET   | <b>80.52</b> | 71.43        | <b>80.52</b> | 76.62        | <b>76.62</b> | 75.32        | <b>70.55</b> | 53.37       |
|                  | GBC     | <b>78.38</b> | 40.54        | <b>78.38</b> | 40.54        | <b>70.27</b> | 37.84        | <b>51.73</b> | 28.87       |
| Pulmonary        | LUCA    | <b>96.23</b> | 83.02        | <b>96.23</b> | 94.34        | <b>96.23</b> | <b>96.23</b> | <b>95.78</b> | 78.58       |
|                  | SCLC    | <b>64.29</b> | <b>64.29</b> | 60.71        | <b>67.86</b> | 57.14        | <b>67.86</b> | <b>52.61</b> | 48.98       |
| Urinary          | KICH    | 97.34        | <b>98.40</b> | 97.34        | <b>98.94</b> | 97.34        | <b>98.94</b> | <b>97.39</b> | 97.33       |
|                  | WT      | <b>95.35</b> | 83.72        | <b>95.35</b> | 86.04        | <b>95.35</b> | 90.70        | <b>92.84</b> | 78.75       |
|                  | UTUC    | <b>85.11</b> | 78.72        | 85.11        | <b>87.23</b> | <b>85.11</b> | 82.98        | <b>80.45</b> | 70.45       |
| Average          |         | <b>69.82</b> | 65.26        | <b>68.74</b> | 66.32        | <b>66.96</b> | 65.86        | <b>61.03</b> | 51.21       |

**Supplementary Table 3. Numerical results of SISH and Yottixel on rare type cancers.** SISH achieved 1-5% higher mMV@k (k=1,3,5) than Yottixel and outperformed 22 out of 23 subtypes on mAP@5.

| Diagnosis    | #WSIs         | #Patients     | source |
|--------------|---------------|---------------|--------|
| GBM          | 816           | 378           | TCGA   |
| LGG          | 838           | 490           | TCGA   |
| ACC          | 227           | 56            | TCGA   |
| PCPG         | 196           | 176           | TCGA   |
| THCA         | 518           | 505           | TCGA   |
| COAD         | 441           | 433           | TCGA   |
| ESCA         | 158           | 156           | TCGA   |
| READ         | 158           | 157           | TCGA   |
| STAD         | 357           | 332           | TCGA   |
| UCEC         | 566           | 505           | TCGA   |
| CESC         | 278           | 268           | TCGA   |
| UCS          | 87            | 53            | TCGA   |
| OV           | 107           | 106           | TCGA   |
| DLBC         | 43            | 43            | TCGA   |
| THYM         | 180           | 121           | TCGA   |
| UVM          | 80            | 80            | TCGA   |
| SKCM         | 473           | 431           | TCGA   |
| CHOL         | 39            | 39            | TCGA   |
| LIHC         | 371           | 363           | TCGA   |
| PAAD         | 209           | 183           | TCGA   |
| LUAD         | 530           | 467           | TCGA   |
| MESO         | 86            | 74            | TCGA   |
| LUSC         | 512           | 478           | TCGA   |
| BLCA         | 457           | 386           | TCGA   |
| KIRC         | 519           | 513           | TCGA   |
| KICH         | 121           | 109           | TCGA   |
| KIRP         | 297           | 273           | TCGA   |
| TGCT         | 254           | 149           | TCGA   |
| PRAD         | 449           | 403           | TCGA   |
| BRCA         | 1,123         | 1,054         | TCGA   |
| HNSCC        | 471           | 449           | TCGA   |
| Mesenchymal  | 600           | 254           | TCGA   |
| C-KIRC       | 503           | 216           | CPTAC  |
| C-UCEC       | 544           | 240           | CPTAC  |
| C-SKCM       | 283           | 93            | CPTAC  |
| C-LUSC       | 679           | 210           | CPTAC  |
| C-LUAD       | 669           | 224           | CPTAC  |
| <b>Total</b> | <b>14,239</b> | <b>10,467</b> |        |

**Supplementary Table 4. Summary of public data.** Slide and patient number of public cohorts used in the experiment. We merge all diagnosis in the Breast, Head and Neck and Mesenchymal since we only use site information for the experiment.

| <b>Diagnosis</b>                      | <b>Oncotree</b> | <b>#WSIs</b> | <b>#Patients</b> |
|---------------------------------------|-----------------|--------------|------------------|
| Glioblastoma Multiforme               | GBM             | 380          | 380              |
| Low-Grade Glioma, NOS                 | LGG             | 62           | 62               |
| Astrocytoma                           | ASTR            | 46           | 46               |
| Anaplastic Astrocytoma                | AASTR           | 30           | 30               |
| Oligodendroglioma                     | ODG             | 28           | 28               |
| Pilocytic Astrocytoma                 | PAST            | 20           | 20               |
| Anaplastic Oligodendroglioma          | AODG            | 14           | 14               |
| Papillary Thyroid Cancer              | THPA            | 316          | 316              |
| Medullary Thyroid Cancer              | THME            | 202          | 202              |
| Follicular Thyroid Cancer             | THFO            | 150          | 150              |
| Anaplastic Thyroid Cancer             | THAP            | 114          | 114              |
| Hurthle Cell Thyroid Cancer           | THHC            | 56           | 56               |
| Colorectal Adenocarcinoma             | COADREAD        | 1,024        | 1,024            |
| Esophageal Adenocarcinoma             | ESCA            | 178          | 178              |
| Esophageal Squamous Cell Carcinoma    | ESCC            | 41           | 41               |
| Anal Squamous Cell Carcinoma          | ANSC            | 39           | 39               |
| Uterine Endometrioid Carcinoma        | UEC             | 480          | 480              |
| High-Grade Serous Ovarian Cancer      | HGSOC           | 242          | 242              |
| Uterine Papillary Serous Carcinoma    | USC             | 157          | 157              |
| Endometrioid Ovarian Cancer           | EOV             | 64           | 64               |
| Clear Cell Ovarian Cancer             | CCOV            | 48           | 48               |
| Cholangiocarcinoma                    | CHOL            | 55           | 55               |
| Hepatocellular Carcinoma              | HCC             | 47           | 47               |
| Gallbladder Cancer                    | GBC             | 37           | 37               |
| Pancreatic Neuroendocrine Tumor       | PANET           | 77           | 77               |
| Melanoma                              | MEL             | 197          | 197              |
| Merkel Cell Carcinoma                 | MCC             | 75           | 75               |
| Cutaneous Squamous Cell Carcinoma     | CSCC            | 38           | 38               |
| Lung Adenocarcinoma                   | LUAD            | 1,377        | 1,377            |
| Lung Squamous Cell Carcinoma          | LUSC            | 392          | 392              |
| Lung Carcinoid                        | LUCA            | 53           | 53               |
| Small Cell Lung Cancer                | SCLC            | 28           | 28               |
| Bladder Urothelial Carcinoma          | BLCA            | 406          | 406              |
| Kidney Renal Clear Cell Carcinoma     | KIRC            | 271          | 271              |
| Kidney Renal Papillary Cell Carcinoma | KIRP            | 96           | 96               |
| Kidney Chromophobe                    | KICH            | 67           | 67               |
| Upper Tract Urothelial Carcinoma      | UTUC            | 47           | 47               |
| Wilms Tumor                           | WT              | 43           | 43               |
| Breast Invasive Ductal Carcinoma      | IDC             | 859          | 859              |
| Breast Invasive Lobular Carcinoma     | ILC             | 290          | 290              |
| Prostate (patch level experiment)     |                 | 23           | 23               |
| Total                                 |                 | 8,169        | 8,169            |

**Supplementary Table 5. Summary of in-house BWH data.** The number of slides and patients in the BWH cohort with oncotree code for subtype in WSI subtyping experiments.

|           | KICH (67)  | WT (43)     | BLCA (406) | UTUC (47)   |
|-----------|------------|-------------|------------|-------------|
| CLAM      |            |             |            |             |
| Fold 0    | 94.44      | 66.67       | 87.80      | 70.00       |
| Fold 1    | 100        | 100         | 85.37      | 30.00       |
| Fold 2    | 100        | 88.89       | 89.02      | 40.00       |
| Fold 3    | 88.99      | 88.89       | 76.83      | 60.00       |
| Fold 4    | 100        | 44.44       | 91.46      | 50.00       |
| Mean±std. | 96.66±4.97 | 77.78±22.22 | 86.10±5.63 | 50.00±15.81 |
| SISH      | 83.58      | 86.05       | 88.42      | 55.32       |

**Supplementary Table 6. 5-fold cross validation accuracy of CLAM for each disease on BWH urinary.** Supervised model on the case with few data tend to have high variance which makes it difficult to evaluate.

**Supplementary Table 7. Individual retrieval result on TCGA cohort.** The individual retrieval result of SISH for each anatomic site on TCGA (n = 9, 367). Each row represents a query slide and the top-5 results with the corresponding hamming distance.

*This large table is available in the accompanying excel sheet.*

**Supplementary Table 8. Individual retrieval result on TCGA plus CPTAC cohort.** The individual retrieval result of SISH for each anatomic site on TCGA plus CPTAC (n = 6, 791). Each row represents a query slide and the top-5 results with the corresponding hamming distance.

*This large table is available in the accompanying excel sheet.*

**Supplementary Table 9. Individual retrieval result on BWH independent test cohort.** The individual retrieval result of SISH for each anatomic site on BWH test cohort (n = 8, 035). Each row represents a query slide and the top-5 result with the corresponding hamming distance.

*This large table is available in the accompanying excel sheet.*

**Supplementary Table 10. Individual retrieval result on rare diseases.** The individual retrieval result of SISH for each anatomic site on rare diseases (n = 1, 785). Each row represents a query slide and the top-5 result with the corresponding hamming distance.

*This large table is available in the accompanying excel sheet.*

**Supplementary Table 11. Individual retrieval result on anatomic site retrieval on TCGA cohort.** The individual retrieval result of SISH for each anatomic site on TCGA (n = 11, 561). Each row represents a query slide and the top-10 results with the corresponding hamming distance

*This large table is available in the accompanying excel sheet.*

**Supplementary Table 12. Individual retrieval result on Kather100k** The individual retrieval result of SISH

**for Kather100k (n = 100, 000).** Each row represents a query slide and the top-5 result with the corresponding hamming distance.

*This large table is available in the accompanying excel sheet.*

**Supplementary Table 13. Individual retrieval result on BWH prostate.** The individual retrieval result

**of SISH for BWH prostate (n = 6, 779).** Each row represents a query slide and the top-5 result with the corresponding hamming distance.

*This large table is available in the accompanying excel sheet.*

**Supplementary Table 14. Individual retrieval result on WSSS4LUAD.** The individual retrieval result

**of SISH for WSSS4LUAD (n = 4, 693).** Each row represents a query slide and the top-5 result with the corresponding hamming distance.

*This large table is available in the accompanying excel sheet.*

**Supplementary Table 15. Individual retrieval result on Atlas.** The individual retrieval result of SISH for

**Atlas (n = 17, 668).** Each row represents a query slide and the top-5 result with the corresponding hamming distance.

*This large table is available in the accompanying excel sheet.*

**Supplementary Table 16. Individual retrieval result on BCSS.** The individual retrieval result of SISH for

**Atlas (n = 7, 691).** Each row represents a query slide and the top-5 result with the corresponding hamming distance.

| Methods            | Patch query | WSI query | No need for patch level annotation | Search time complexity |
|--------------------|-------------|-----------|------------------------------------|------------------------|
| Hedge et al (2019) | √           |           |                                    | $O(\log(n))$           |
| Karla et al (2019) | √           | √         | √                                  | $O(n\log(n))$          |
| Zheng et al (2019) | √           |           |                                    | $O(n)$                 |
| SISH               | √           | √         | √                                  | $O(1)$                 |

**Supplementary Table 17. The summary of several recent related works.** We reported each related work and their ability and limitation. The column "No need for patch level annotation" refers to whether patch level annotation needed when WSI used as a query



| Symbol                      | Definition                                                                                                                                                              |
|-----------------------------|-------------------------------------------------------------------------------------------------------------------------------------------------------------------------|
| $x$                         | Input vector of VQ-VAE.                                                                                                                                                 |
| $e$                         | Latent vector in the codebook.                                                                                                                                          |
| $z_{i,1}, z_{i,2}, z_{i,3}$ | Original latent codes from VQ-VAE for the input patch $i$                                                                                                               |
| $K$                         | The number of codewords in the codebook.                                                                                                                                |
| $D$                         | The dimension of each codeword in the codebook                                                                                                                          |
| $M$                         | A constant that determines the complexity of our pipeline                                                                                                               |
| $I$                         | Whole slide image                                                                                                                                                       |
| $C$                         | Width of interval used in index expansion ( $C = 50 \times 10^{11}$ )*                                                                                                  |
| $T$                         | Number of times an index expands itself for one side ( $T = 10$ )*                                                                                                      |
| $N$                         | A constant that used to ensure the weighted count in WEIGHTED- UNCERTAINTY-CAL for all diagnoses are close to 1                                                         |
| $m_i$                       | Integer index of the patch $i$ in the query mosaic                                                                                                                      |
| $h_i$                       | Binarized texture feature from DenseNet121                                                                                                                              |
| $m_{i,c+}$                  | Expanded integer index for patch $i$ (left-side)                                                                                                                        |
| $m_{i,c-}$                  | Expanded integer index for patch $i$ (right-side)                                                                                                                       |
| $\theta_h$                  | Maximum threshold of the hamming distance between two patches to be considered similar*                                                                                 |
| $k_{succ}$                  | Number of times to perform forward search ( $k_{succ} = 375$ )*                                                                                                         |
| $k_{pred}$                  | Number of times to perform backward search ( $k_{pred} = 375$ )*                                                                                                        |
| $R_I$                       | Collection of search results $r_i$ of whole slide image $I$                                                                                                             |
| $S_m$                       | A list stores tuple of form (index of $r_i$ , entropy, hamming distance info in $\mu_{ij}$ , length of $r_i$ )                                                          |
| $S_l$                       | An array that only stores the length of $r_i$                                                                                                                           |
| $S_{lb}$                    | A nested dictionary that stores the disease occurrences in $r_i$                                                                                                        |
| $O_l$                       | The lower percentile to be considered in the sample in $S_l$ ( $O_l = 5\%$ )*                                                                                           |
| $O_h$                       | The upper percentile to be considered in the sample in $S_l$ ( $O_h = 95\%$ )*                                                                                          |
| $l$                         | The number of unique length of patch's retrieval results in the query mosaic ( $l=3$ )*                                                                                 |
| $r_i$                       | Search result for each patch $i$ in the query mosaic                                                                                                                    |
| $p$                         | Integer index of a patch                                                                                                                                                |
| $p_{ij}$                    | $j$ -th integer index in the $i$ -th search result $r_i$                                                                                                                |
| $\mu$                       | Metadata associated with a patch in the database, including the slide-level label, slide name, slide extension and position where the patch from                        |
| $\mu_{ij}$                  | Metadata associated with the $j$ -th patch in $i$ -th search result $r_i$ , which includes all information from $\mu$ plus the hamming distance between $h_i$ and $h_j$ |
| $k_{\theta'_h}$             | Number of patches used to calculate the threshold $\theta'_h$ ( $k_{\theta'_h} = 5$ )*                                                                                  |
| $k_f$                       | The first $k_f$ element used to produce pseudo label in FILTER-BY-PREDICTION ( $k_f = 5$ )*                                                                             |
| $\theta'_h$                 | Maximum threshold of the hamming distance to filter out $S_m$ and determine the similarity during extraction                                                            |

**Supplementary Table 18: The symbols and definitions used in the online method.** The value of the symbols marked with \* were determined by the results across all experiments. We only choose a set of parameter that works best for all experiment except  $\theta_h$ . One can further optimize for each anatomic site accordingly. For  $\theta_h$ , we set it to 128 for all slide level experiment and kather100k, 150 for other patch data retrieval and 256 for patch speed experiment.

| <b>Dataset</b> | <b>Link</b>                                                                                                               |
|----------------|---------------------------------------------------------------------------------------------------------------------------|
| TCGA data      | <a href="https://portal.gdc.cancer.gov/repository">https://portal.gdc.cancer.gov/repository</a>                           |
| CPTAC data     | <a href="https://www.cancerimagingarchive.net/datascope/cptac/">https://www.cancerimagingarchive.net/datascope/cptac/</a> |
| Kather100k     | <a href="https://zenodo.org/record/1214456#.Ysde5hNKj-Y">https://zenodo.org/record/1214456#.Ysde5hNKj-Y</a>               |
| Atlas          | <a href="https://www.dsp.utoronto.ca/projects/ADP/">https://www.dsp.utoronto.ca/projects/ADP/</a>                         |
| BCSS           | <a href="https://bcsegmentation.grand-challenge.org/">https://bcsegmentation.grand-challenge.org/</a>                     |
| WSSS4LUAD      | <a href="https://wsss4luad.grand-challenge.org/">https://wsss4luad.grand-challenge.org/</a>                               |

**Supplementary Table 19: Access link to public datasets used in the study.**
